# Supplementary material for: Altered Protein Interactions of the Endogenous Interactome of PTPIP51 towards MAPK Signaling
Source: PubMed Central journal article supplement (PMC5618236; doi:10.3390/biom7030055), 2017-07-21
Supplement: biomolecules-07-00055-s001.pdf [file biomolecules-07-00055-s001.pdf]

Table S1. Antibody list. List of all antibodies used in this study.

|                                                                                                                 | <b>Immunogen</b>                                                    | <b>Antibody Source</b> | <b>Clone</b> | <b>Dilution</b> | <b>Manufacturer</b>                                                  | <b>Application</b> | <b>Reference</b> |
|-----------------------------------------------------------------------------------------------------------------|---------------------------------------------------------------------|------------------------|--------------|-----------------|----------------------------------------------------------------------|--------------------|------------------|
| <p><b>PTPIP51</b></p> <p><b>(P51ab)</b></p> <p>The specificity was controlled by preabsorption experiments.</p> | Human recombinant PTPIP51 protein encoding amino acids (aa) 131-470 | Rabbit polyclonal      |              | 1:500           | Prof. HW Hofer, Biochemical Department, University Konstanz, Germany | WB, DPLA           | [1-4]            |
| <p><b>PTPIP51-anti-pTyr176 PTPIP51</b></p> <p>The specificity was controlled by RP-HPLC MassSpectrum</p>        | KLH-coupled peptide with the sequence:<br>CDAESEGG[pT]TAN<br>AE     | Guinea pig polyclonal  |              | 1:1000          | Biolux, Stuttgart, Germany                                           | IHC                | [4]              |
| <p><b>PTPIP51 anti-pSer46 PTPIP51</b></p> <p>The specificity was controlled by RP-HPLC MassSpectrum</p>         | KLH-coupled peptide with the sequence:<br>CQRHGRSQ[pS]LP<br>NS      | Guinea pig polyclonal  |              | 1:500           | Genosphere Biotechnologies, Paris, France                            | IHC                | [5]              |
| <p><b>PTPIP51 anti-pSer212 PTPIP51</b></p>                                                                      | KLH-coupled peptide with the sequence:                              | Rabbit polyclonal      |              | 1:500           | Genosphere Biotechnologies, Paris, France                            | IHC                |                  |

|                                                        |                                                                       |                  |              |       |                                                          |      |      |
|--------------------------------------------------------|-----------------------------------------------------------------------|------------------|--------------|-------|----------------------------------------------------------|------|------|
| The specificity was controlled by RP-HPLC MassSpectrum | CETVKMGRKD[pS]<br>LDLE                                                |                  |              |       |                                                          |      |      |
| <b>PTP1B</b>                                           | Recombinant protein corresponding to aa 1-321 of human PTP1B          | Mouse monoclonal | 107AT5<br>31 | 1:200 | Abnova<br>Cat.# MAB1152<br>Lot:<br>SDG070208D            | DPLA | [6]  |
| <b>14-3-3β</b>                                         | Epitope mapping between aa 220-244 at the C-terminus of human 14-3-3β | Mouse monoclonal | A-6          | 1:100 | Santa Cruz Biotechnology<br>Cat.# sc-25276<br>Lot: F1011 | DPLA | [7]  |
| <b>Raf-1</b>                                           | Epitope mapping the C-terminus of Raf-1                               | Mouse monoclonal | E-10         | 1:100 | Santa Cruz Biotechnology<br>Cat.# sc-7267<br>Lot: E0411  | DPLA | [8]  |
| <b>EGFR</b>                                            | raised against plasma membranes of A431 cells                         | Mouse monoclonal | 2E9          | 1:100 | Santa Cruz Biotechnology<br>Cat.# sc-57091<br>Lot: B1307 | DPLA | [9]  |
| <b>ERK1/2</b>                                          | raised against synthetic peptide corresponding to                     | Mouse Monoclonal | MK12         | 1:100 |                                                          | DPLA | [10] |

|                                                                                               |                                                                                                                           |                     |       |       |                                                               |      |      |
|-----------------------------------------------------------------------------------------------|---------------------------------------------------------------------------------------------------------------------------|---------------------|-------|-------|---------------------------------------------------------------|------|------|
| <b>(p42/44)</b>                                                                               | aa336-356<br>of human ERK1                                                                                                |                     |       |       | Merck Millipore<br>Cat.# 05-1152<br>Lot: 1956740              |      |      |
| <b>pERK</b>                                                                                   | Epitope<br>corresponding to a<br>sequence containing<br>Tyr204 phosphorylated<br>ERK of human origin                      | Mouse<br>monoclonal | E-4   | 1:100 | Santa Cruz<br>Biotechnology<br>Cat. # sc-7383<br>Lot: F2613   | DPLA | [11] |
| <b>CGI99</b>                                                                                  | epitope mapping at<br>the N-terminus of<br>CGI-99 of human<br>origin                                                      | Goat<br>polyclonal  | N-14  | 1:100 | Santa Cruz<br>Biotechnology<br>Cat. # sc-104834<br>Lot: C0310 | DPLA | [4]  |
| <b>Nuf-2<br/>(cdcA1)</b>                                                                      | raised against aa<br>1–300 mapping at<br>the N-terminus of<br>CdcA1 human origin                                          | Mouse<br>monoclonal | E-6   | 1:100 | Santa Cruz<br>Biotechnology<br>Cat.# sc-271251<br>Lot: E2510  | DPLA | [12] |
| <b>RelA</b><br><br>validated in<br>EMSA, FC,<br>ICC, IF, IHC,<br>IHC(P), WB to<br>detect NFκB | Specific for an<br>epitope overlapping<br>the nuclear location<br>signal of the p65<br>subunit of the NFκB<br>heterodimer | Mouse<br>monoclonal | 12H11 | 1:100 | Millipore<br>Cat.# MAB3026<br>Lot: 2580674                    | DPLA | [13] |

|                                                                                                                                                                                                                            |                                                                                      |                  |        |       |                                               |      |      |
|----------------------------------------------------------------------------------------------------------------------------------------------------------------------------------------------------------------------------|--------------------------------------------------------------------------------------|------------------|--------|-------|-----------------------------------------------|------|------|
| also known as<br>Rel A                                                                                                                                                                                                     |                                                                                      |                  |        |       |                                               |      |      |
| <b>Rac1</b><br><br>routinely evaluated by immunoblot on rat brain microsomal protein validated for use in Immunohistochemistry (IHC), Immunoprecipitation (IP) and Western Blotting (WB) for the detection of Rac1 protein | Recombinant protein containing the full length human Rac1                            | Mouse monoclonal | 23A8   | 1:100 | Merck-Millipore<br>Cat.# 05-389<br>Lot: E0411 | DPLA | [14] |
| <b>VAPB</b>                                                                                                                                                                                                                | E. coli-derived recombinant human VAP-B. Ala2-Pro132                                 | Mouse monoclonal | 736904 | 1:100 | R&D systems<br>Cat.# MAB58551                 | DPLA | [15] |
| <b>IR (β-subunit)</b><br><br>Routinely evaluated by Western Blot on NIH/3T3 lysates.                                                                                                                                       | Recombinant-fragment including C-terminal 100 aa of human insulin receptor β-subunit | Mouse monoclonal | CT-3   | 1:100 | Merck-Millipore<br>Cat.#05-1104               | DPLA | [16] |

|                                                                                                                        |                                                                                       |                   |      |        |                                                           |      |      |
|------------------------------------------------------------------------------------------------------------------------|---------------------------------------------------------------------------------------|-------------------|------|--------|-----------------------------------------------------------|------|------|
| Western Blot Analysis: 1:500 dilution of this lot detected Insulin Receptor, beta subunit on 10 µg of NIH/3T3 lysates. |                                                                                       |                   |      |        |                                                           |      |      |
| <b>Grb2</b>                                                                                                            | raised against amino acids 54-164 mapping to a central domain of GRB2 of mouse origin | Mouse monoclonal  | C-7  | 1:100  | Santa Cruz Biotechnology<br>Cat.# sc-8034<br>Lot: 2614    | DPLA | [17] |
| <b>c-Src</b>                                                                                                           | raised against full-length recombinant c-Src of human origin                          | Mouse monoclonal  | H-12 | 1:100  | Santa Cruz Biotechnology<br>Cat.# sc-5266<br>Lot: K2509   | DPLA | [18] |
| <b>GSK3β</b>                                                                                                           | raised against amino acids 345-420 mapping at the C-terminus of GSK3β of human origin | Mouse monoclonal  | E11  | 1:100  | Sanat Cruz Biotechnology<br>Cat.# sc-377213<br>Lot: A3114 | DPLA | [19] |
| <b>Phospho-Akt (Ser473)</b>                                                                                            | a synthetic phosphopeptide corresponding to                                           | Rabbit monoclonal | D9E  | 1:2500 | Cell signaling technology                                 | WB   | [20] |

|                                    |                                                                                                        |                   |           |        |                                                    |    |      |
|------------------------------------|--------------------------------------------------------------------------------------------------------|-------------------|-----------|--------|----------------------------------------------------|----|------|
|                                    | residues surrounding Ser473 of mouse Akt                                                               |                   |           |        | Cat.# 4060<br>Lot: 19                              |    |      |
| <b>Phospho-p42/p44 MAPK</b>        | a synthetic phosphopeptide corresponding to residues surrounding Thr202/Tyr204 of human p44 MAP kinase | Rabbit monoclonal | D13.14.4E | 1:2500 | Cell signaling technology<br>Cat.# 4370<br>Lot: 12 | WB | [21] |
| <b>Phospho-cdc2 (Tyr15) (CDK1)</b> | synthetic phosphopeptide corresponding to residues surrounding Tyr15 of human cdc2                     | Rabbit monoclonal | 10A11     | 1:2500 | Cell signaling technology<br>Cat.# 4539<br>Lot:2   | WB | [22] |
| <b>Phospho-PKCα (Thr638)</b>       | A synthetic phosphopeptide corresponding to residues surrounding Thr638 of human PKC alpha.            | Rabbit monoclonal | E195      | 1:2500 | Abcam<br>Cat.# ab32502<br>Lot: GR13679-1           | WB | [23] |

|                                                  |                                                                                 |                   |     |        |                                                     |     |      |
|--------------------------------------------------|---------------------------------------------------------------------------------|-------------------|-----|--------|-----------------------------------------------------|-----|------|
| <b>Phospho-GSK3<math>\beta</math> (S9)</b>       | synthetic phosphopeptide corresponding to the sequence of human GSK-3 $\beta$ . | Rabbit monoclonal | 5B3 | 1:2500 | Cell signalling technology<br>Cat.# 9323<br>Lot: 13 | WB  | [24] |
| <b>Alexa 555 Coupled to anti-rabbit antibody</b> | Rabbit gamma immunoglobins heavy and light chains                               | Goat polyclonal   |     | 1:1600 | Life Technology<br>Cat.# A21428<br>Lot:             | IHC |      |
| <b>Alexa 488 Coupled to anti-mouse antibody</b>  | IgG heavy chains from mouse                                                     | Goat polyclonal   |     | 1:800  | Life Technology<br>Cat# A11029<br>Lot:              | IHC |      |
| <b>Cy3 donkey anti-guinea pig</b>                | IgG (H+L) from guinea pig                                                       | Donkey polyclonal |     | 1:400  | Dianova<br>Cat.# 706166148<br>Lot:                  | IHC |      |
| <b>HRP goat anti-rabbit</b>                      | IgG isolated from rabbit serum                                                  | Goat polyclonal   |     | 1:5000 | Dako<br>Cat.# P0448<br>Lot: 20027913                | WB  |      |

## References:

1. Barop, J.; Barop, J.; Sauer, H.; Sauer, H.; Steger, K.; Steger, K.; Wimmer, M.; Wimmer, M. Differentiation-dependent PTPIP51 expression in human skeletal muscle cell culture. *J Histochem Cytochem* **2009**, *57*, 425–435.
2. Stenzinger, A.; Kajosch, T.; Tag, C.; Porsche, A.; Welte, I.; Hofer, H.-W.; Steger, K.; Wimmer, M. The novel protein PTPIP51 exhibits tissue- and cell-specific expression. *Histochem Cell Biol* **2005**, *123*, 19–28.
3. Koch, P.; Viard, M.; Stenzinger, A.; Brobeil, A.; Tag, C.; Steger, K.; Wimmer, M. Expression profile of PTPIP51 in mouse brain. *J. Comp. Neurol.* **2009**, *517*, 892–905.
4. Brobeil, A.; Graf, M.; Eiber, M.; Wimmer, M. Interaction of PTPIP51 with Tubulin, CGI-99 and Nuf2 During Cell Cycle Progression. *Biomolecules* **2012**, *2*, 122–142.
5. Brobeil, A.; Bobrich, M.; Tag, C.; Wimmer, M. PTPIP51 in protein interactions: regulation and in situ interacting partners. *Cell Biochem. Biophys.* **2012**, *63*, 211–222.
6. Brobeil, A.; Graf, M.; Oeschger, S.; Steger, K.; Wimmer, M. PTPIP51-a myeloid lineage specific protein interacts with PTP1B in neutrophil granulocytes. *Blood Cells Mol. Dis.* **2010**, *45*, 159–168.
7. Yam, P. T.; Kent, C. B.; Morin, S.; Farmer, W. T.; Alchini, R.; Lepelletier, L.; Colman, D. R.; Tessier-Lavigne, M.; Fournier, A. E.; Charron, F. 14-3-3 proteins regulate a cell-intrinsic switch from sonic hedgehog-mediated commissural axon attraction to repulsion after midline crossing. *Neuron* **2012**, *76*, 735–749.
8. Bunda, S.; Burrell, K.; Heir, P.; Zeng, L.; Alamsahebpour, A.; Kano, Y.; Raught, B.; Zhang, Z.-Y.; Zadeh, G.; Ohh, M. Inhibition of SHP2-mediated dephosphorylation of Ras suppresses oncogenesis. *Nat Commun* **2015**, *6*, 8859.
9. Downward, J.; Parker, P.; Waterfield, M. D. Autophosphorylation sites on the epidermal growth factor receptor. *Nature* **1984**, *311*, 483–485.
10. Chen, K.-T.; Tsai, M.-H.; Wu, C.-H.; Jou, M.-J.; Wei, I.-H.; Huang, C.-C. AMPA Receptor-mTOR Activation is Required for the Antidepressant-Like Effects of Sarcosine during the Forced Swim Test in Rats: Insertion of AMPA Receptor may Play a Role. *Front Behav Neurosci* **2015**, *9*, 162.
11. Giri, K.; Pabelick, C. M.; Mukherjee, P.; Prakash, Y. S. Hepatoma derived growth factor (HDGF) dynamics in ovarian cancer cells. *Apoptosis* **2016**, *21*, 329–339.
12. Sugimasa, H.; Taniue, K.; Kurimoto, A.; Takeda, Y.; Kawasaki, Y.; Akiyama, T. Heterogeneous nuclear ribonucleoprotein K upregulates the kinetochore complex component NUF2 and promotes the tumorigenicity of colon cancer cells. *Biochem. Biophys. Res. Commun.* **2015**, *459*, 29–35.
13. Díaz, L.; Martínez-Bonet, M.; Sánchez, J.; Fernández-Pineda, A.; Jiménez, J. L.; Muñoz, E.; Moreno, S.; Álvarez, S.; Muñoz-Fernández, M. Á. Bryostatins activate HIV-1 latent expression in human astrocytes through a PKC and NF-κB-dependent mechanism. *Sci Rep* **2015**, *5*, 12442.
14. Hinterseher, I.; Schworer, C. M.; Lillvis, J. H.; Stahl, E.; Erdman, R.; Gatalica, Z.; Tromp, G.; Kuivaniemi, H. Immunohistochemical analysis of the natural killer cell cytotoxicity pathway in human abdominal aortic aneurysms. *Int J Mol Sci* **2015**, *16*, 11196–11212.
15. Prosser, D. C.; Tran, D.; Gougeon, P.-Y.; Verly, C.; Ngsee, J. K. FFAT rescues VAPA-mediated inhibition of ER-to-Golgi transport and VAPB-mediated ER aggregation. *J. Cell. Sci.* **2008**, *121*, 3052–3061.
16. Stuart, C. A.; South, M. A.; Lee, M. L.; McCurry, M. P.; Howell, M. E. A.; Ramsey, M. W.; Stone, M. H. Insulin responsiveness in metabolic syndrome after eight weeks of cycle training. *Med Sci Sports Exerc* **2013**, *45*, 2021–2029.



17. Liu, S.; Zhang, H.; Li, M.; Hu, D.; Li, C.; Ge, B.; Jin, B.; Fan, Z. Recruitment of Grb2 and SHIP1 by the ITT-like motif of TIGIT suppresses granule polarization and cytotoxicity of NK cells. *Cell Death Differ.* **2013**, *20*, 456–464.
18. Kung, M.-L.; Hsieh, C.-W.; Tai, M.-H.; Weng, C.-H.; Wu, D.-C.; Wu, W.-J.; Yeh, B.-W.; Hsieh, S.-L.; Kuo, C.-H.; Hung, H.-S.; Hsieh, S. Nanoscale characterization illustrates the cisplatin-mediated biomechanical changes of B16-F10 melanoma cells. *Phys Chem Chem Phys* **2016**, *18*, 7124–7131.
19. Fan, C.; Jiang, G.; Zhang, X.; Miao, Y.; Lin, X.; Luan, L.; Xu, Z.; Zhang, Y.; Zhao, H.; Liu, D.; Wang, E. Zbed3 contributes to malignant phenotype of lung cancer via regulating  $\beta$ -catenin and P120-catenin 1. *Mol. Carcinog.* **2015**, *54 Suppl 1*, E138–47.
20. Zhen, L.; Li, J.; Zhang, M.; Yang, K. MiR-10b decreases sensitivity of glioblastoma cells to radiation by targeting AKT. *Journal of Biological Research-Thessaloniki* **2016**, *23*, 357.
21. Jang, H. J.; Hong, E. M.; Park, S. W.; Byun, H. W.; Koh, D. H.; Choi, M. H.; Kae, S. H.; Lee, J. Statin induces apoptosis of human colon cancer cells and downregulation of insulin-like growth factor 1 receptor via proapoptotic ERK activation. *Oncol Lett* **2016**, *12*, 250–256.
22. Grolmusz, V. K.; Tóth, E. A.; Baghy, K.; Likó, I.; Darvasi, O.; Kovalszky, I.; Matkó, J.; Rácz, K.; Patócs, A. Fluorescence activated cell sorting followed by small RNA sequencing reveals stable microRNA expression during cell cycle progression. *BMC Genomics* **2016**, *17*, 8507.
23. Lin, G.; Brownsey, R. W.; MacLeod, K. M. Complex Regulation of PKC $\beta$ 2 and PDK-1/AKT by ROCK2 in Diabetic Heart. *PLoS ONE* **2014**, *9*, e86520.
24. Fagnocchi, L.; Cherubini, A.; Hatsuda, H.; Fasciani, A.; Mazzoleni, S.; Poli, V.; Berno, V.; Rossi, R. L.; Reinbold, R.; Endelev, M.; Schroeder, T.; Rocchigiani, M.; Szkarlat, Ž.; Oliviero, S.; Dalton, S.; Zippo, A. A Myc-driven self-reinforcing regulatory network maintains mouse embryonic stem cell identity. *Nat Commun* **2016**, *7*, 11903.



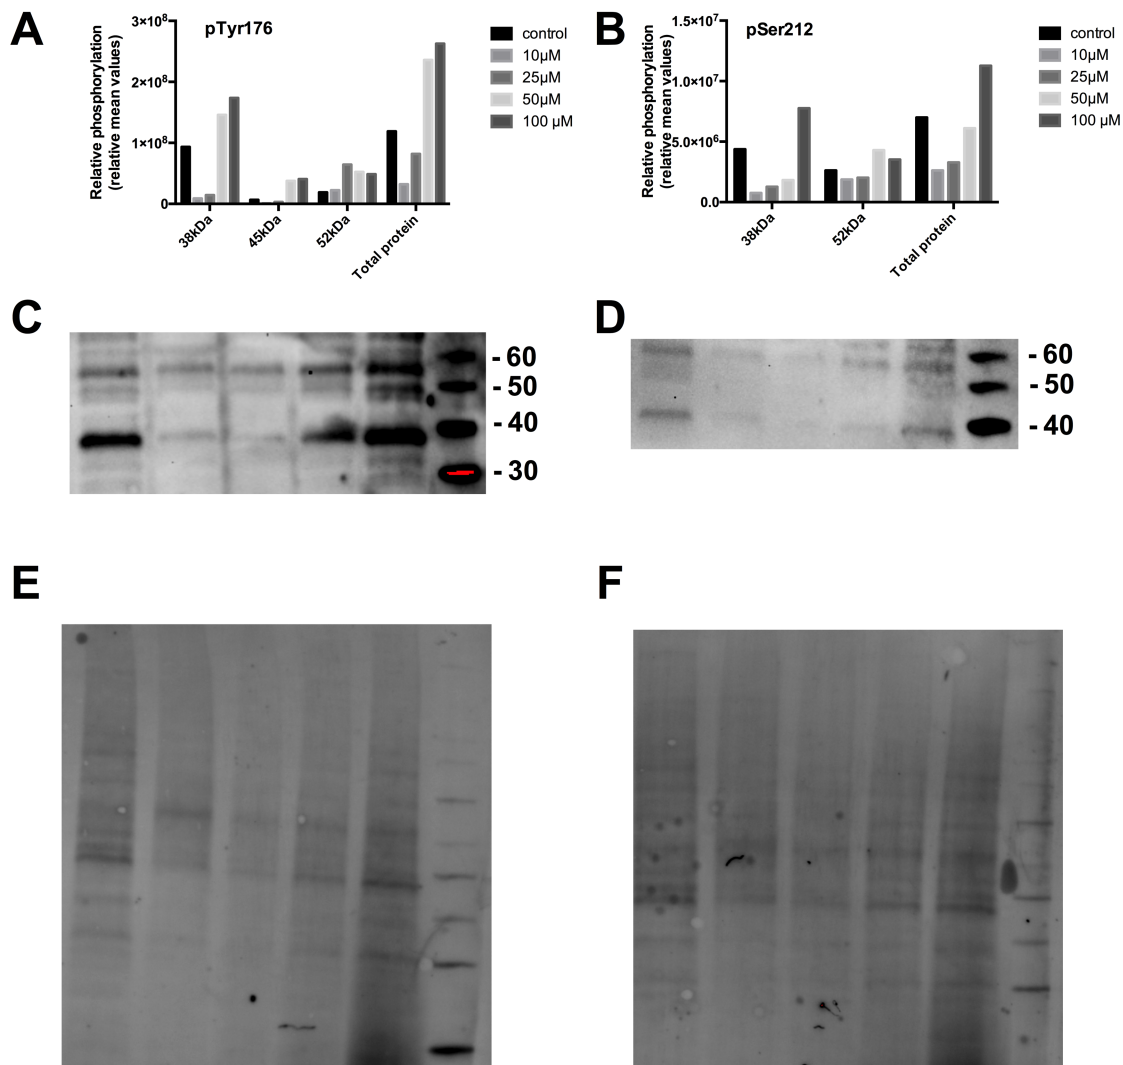

Supplementary information, Figure S1. Immunoblot analyses of the phosphotyrosine 176 and phosphoserine 212 status of PTPIP51.

- Phosphorylation of the tyrosine 176 residue. Quantification data of the blot shown in C. Each detected isoform was quantified separately. Total protein was calculated as the sum of the three detected isoforms.
- Phosphorylation of the serine 212 residue. Quantification data of the blot shown in D. Each detected isoform was quantified separately. Total protein was calculated as the sum of the three detected isoforms.
- Immunoblot using the specific antibody raised against phosphorylated tyrosine 176 residue.

- D. Immunoblot using the specific antibody raised against phosphorylated tyrosine 212 residue.
- E. Stain-free blot for quantification of the phosphorylated tyrosine 176 residue.
- F. Stain-free blot for quantification of the phosphorylated tyrosine 212 residue.

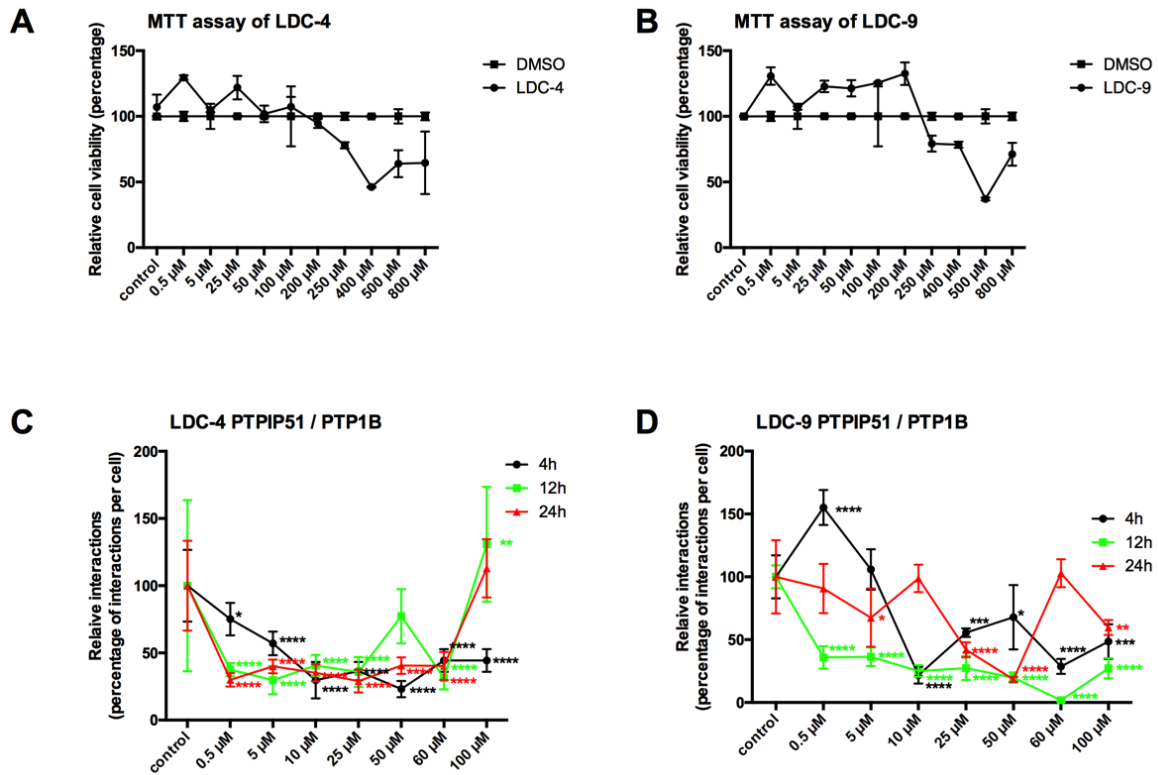

Supplementary information, Figure S2. MTT assay of HaCaT cells treated with LDC-4 and LDC-9 and the LDC-4 and LDC-9 effects on the time dependent interaction profile of PTPIP51 and PTP1B.

A. Cell viability of LDC-4 treated HaCaT cells assayed by MTT.

B. Cell viability of LDC-9 treated HaCaT cells assayed by MTT.

To exclude the toxic effect of DMSO, a second curve was established applying gradient amounts of DMSO comparable to the amount added with the rising concentrations of the effector added to the test system. The values for LDC-4 and LDC-9 treated cells were calculated as the percental quotient of the LDC-4 or LDC-9 value and the DMSO value.

C. Using LDC4 for 4 h in increasing concentrations progressively depressed the rate of PTPIP51/PTP1B interaction. Yet, highly significant differences to normal controls were only seen with concentrations starting from 10 $\mu$ M up to 100 $\mu$ M ( $p < 0.0001$ ). Extending the time of exposure to 12 h changed the pattern only at concentrations of 50 $\mu$ M reaching near normal values and at 100 $\mu$ M where the concentrations were higher than those of the controls.

Prolongation to 24h of incubation time displayed a pattern comparable to that seen after 12h of LDC4 application.

D. Application of LDC9 in increasing concentrations led to significant changes of the PTP51/PTP1B. After 4 h incubation the interactions slightly increased under the influence of 0.5 $\mu$ M LDC9 and were normalized under 5 $\mu$ M. Using concentrations of 10 $\mu$ M and higher negatively influenced the number of interactions to values being significantly different from the controls (10 $\mu$ M  $p < 0.001$ , 25 $\mu$ M  $p < 0.01$ , 50 $\mu$ M  $p < 0.05$ , 60 $\mu$ M  $p < 0.0001$ , 100 $\mu$ M  $p < 0.05$ ). Prolongation of the incubation time to 12h significantly reduced the number of interactions for all applied concentrations (0.5 $\mu$ M, 10 $\mu$ M, 50 $\mu$ M, 60 $\mu$ M and 100 $\mu$ M  $p < 0.0001$ , 5 $\mu$ M and 25  $\mu$ M  $p < 0.001$ ). After 24 h of incubation with LDC9 all concentrations decreased the number of interactions, but only high concentrations were able to exert a significant reduction (25 $\mu$ M  $p < 0.001$ , 50 $\mu$ M  $p < 0.0001$ , 100 $\mu$ M  $p < 0.05$ ).

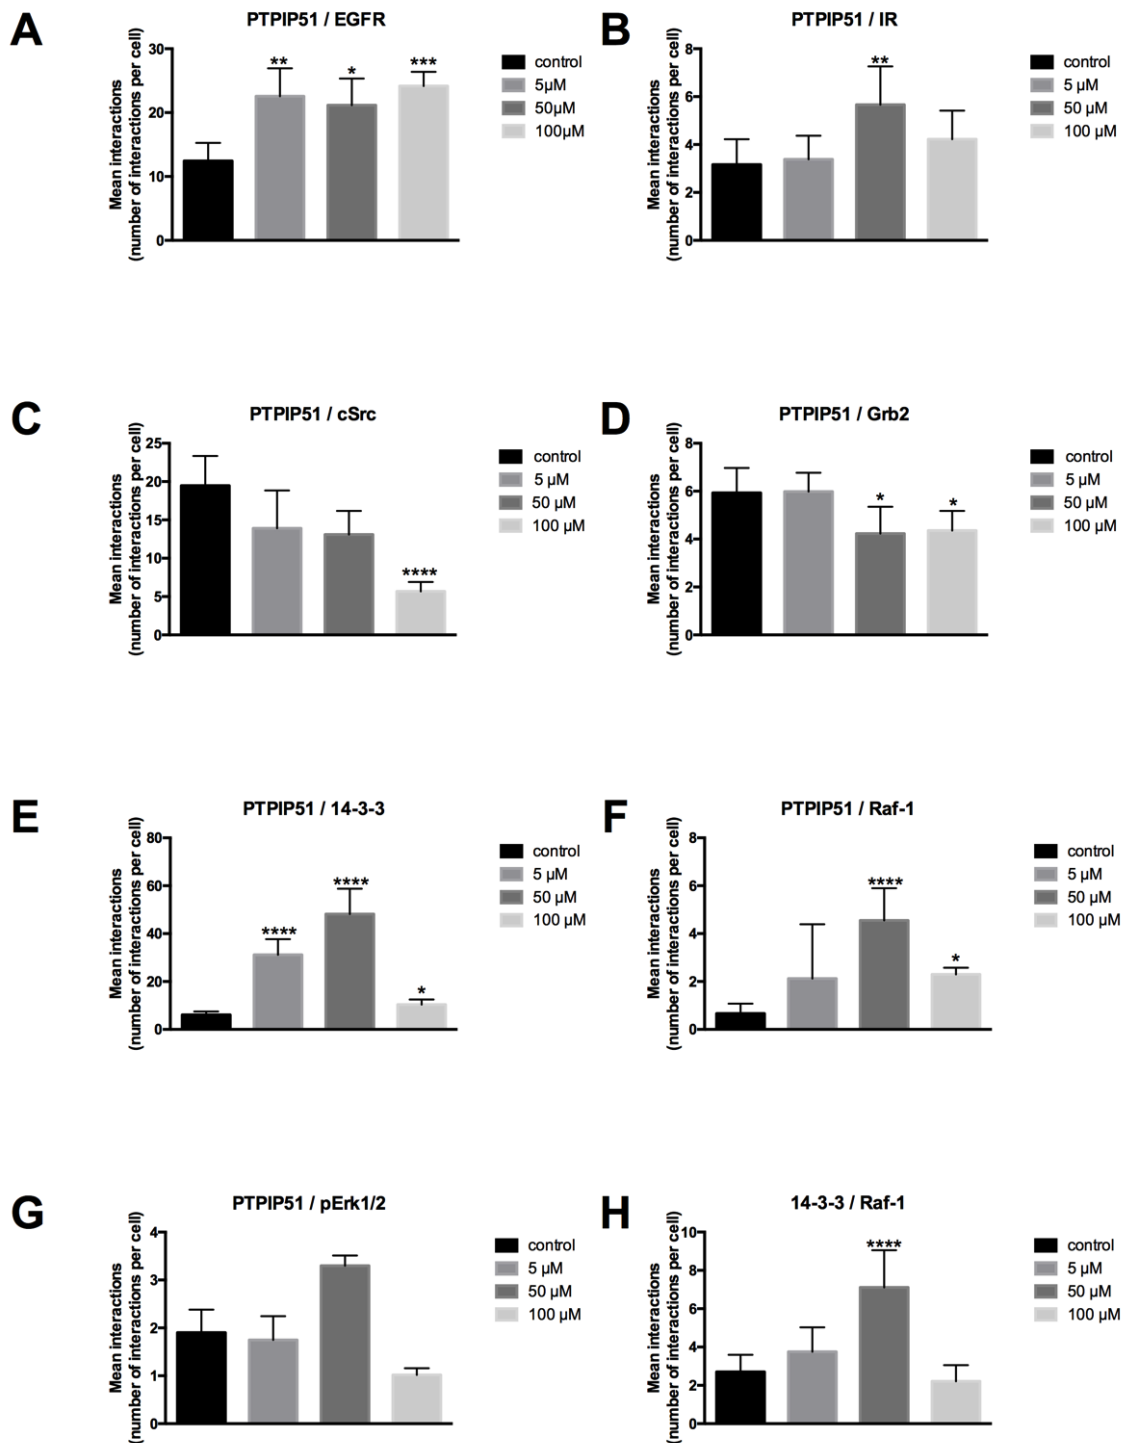

Supplementary information, Figure S3. Effects of LDC-3 on the receptor tyrosine kinase signaling and associated adapter molecules and on the MAPK signaling pathway.

Quantitative analysis of the Duolink proximity ligation assay of PTPIP51/EGFR (A), PTPIP51/IR (B), PTPIP51/c-Src (C) and PTPIP51/Grb2 (D). The interactions were evaluated

by Duolink Image Tool software in untreated controls and in cells treated with 5 $\mu$ M, 50 $\mu$ M and 100 $\mu$ M LDC-3 for 12h.

Quantitative analysis of the Duolink proximity ligation assay of PTPIP51/14-3-3 (E), PTPIP51/Raf-1 (F), PTPIP51/pErk1/2 (G) and 14-3-3/Raf-1 (H). The interactions were evaluated by Duolink Image Tool software in untreated controls and in cells treated with 5 $\mu$ M, 50 $\mu$ M and 100 $\mu$ M LDC-3 for 12h.

The resulting data were analyzed by GraphPad Prism 6 software, the significance of the results was tested by Dunnett's multiple comparisons test. \* ( $p < 0.05$ ), \*\* ( $p < 0.01$ ), \*\*\* ( $p < 0.001$ )



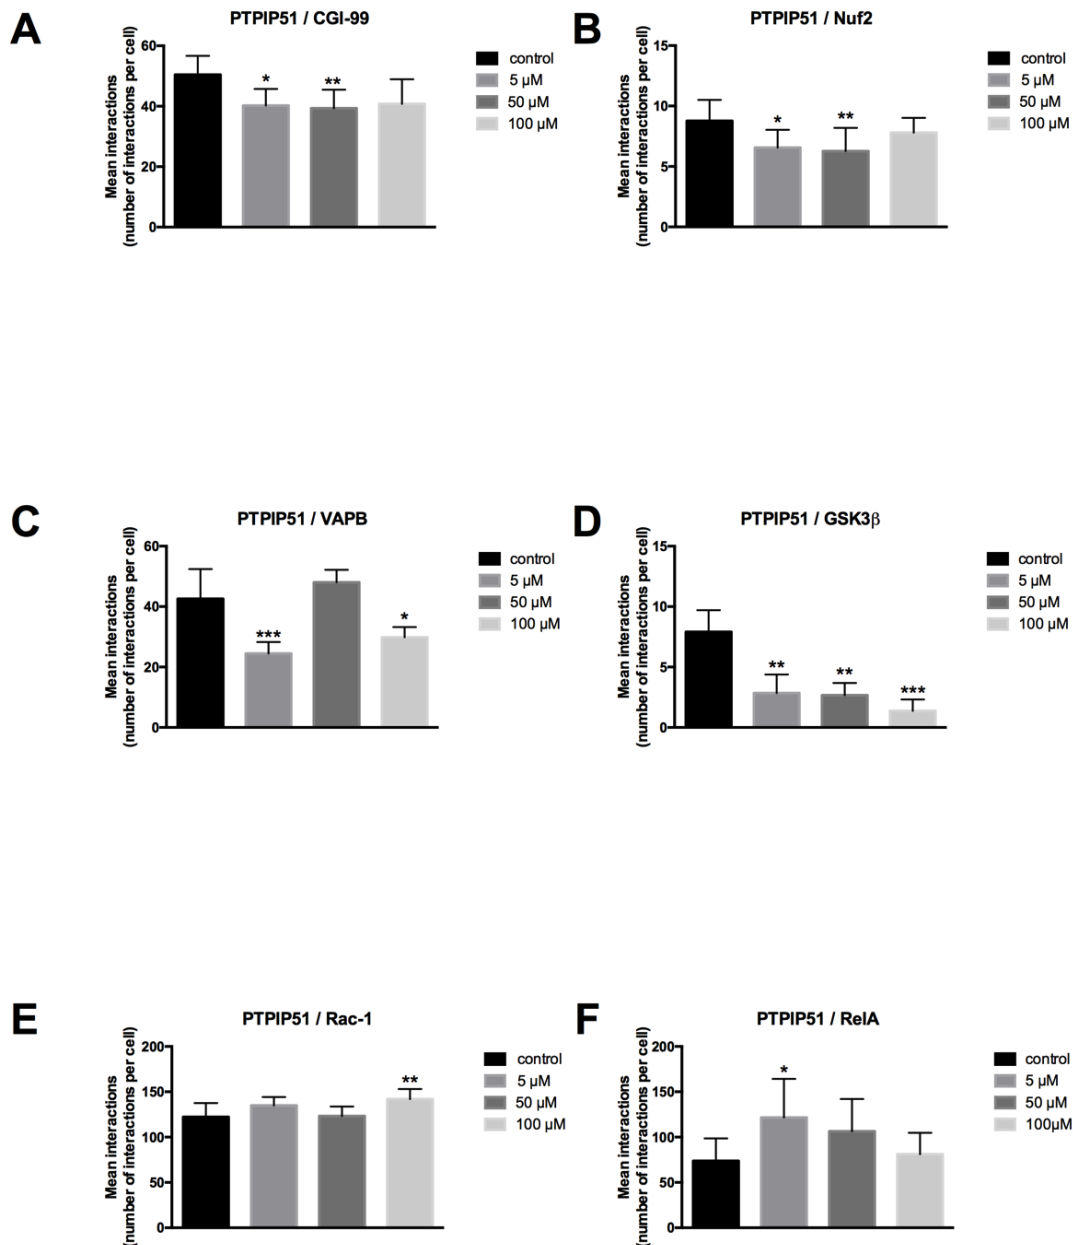

Supplementary information, Figure S4. Effects of LDC-3 on the mitotic interactome of PTPIP51, the NFκB pathway, the Ca<sup>2+</sup> homeostasis and the cell motility.

Quantitative analysis of the Duolink proximity ligation assay of PTPIP51/CGI-99 (A) and PTPIP51/Nuf2 (B). The interactions were evaluated by Duolink Image Tool software in untreated controls and in cells treated with 5μM, 50μM and 100μM LDC-3 for 12h.

Quantitative analysis of the Duolink proximity ligation assay of PTPIP51/VAPB (C), PTPIP51/GSK3β (D), PTPIP51/Rac-1 (E), PTPIP51/RelA (F). The interactions were evaluated by Duolink Image Tool software in untreated controls and in cells treated with 5μM, 50μM and 100μM LDC-3 for 12h.

The resulting data were analyzed by GraphPad Prism 6 software, the significance of the results was tested by Dunnett's multiple comparisons test. \* ( $p < 0.05$ ), \*\* ( $p < 0.01$ ), \*\*\* ( $p < 0.001$ )

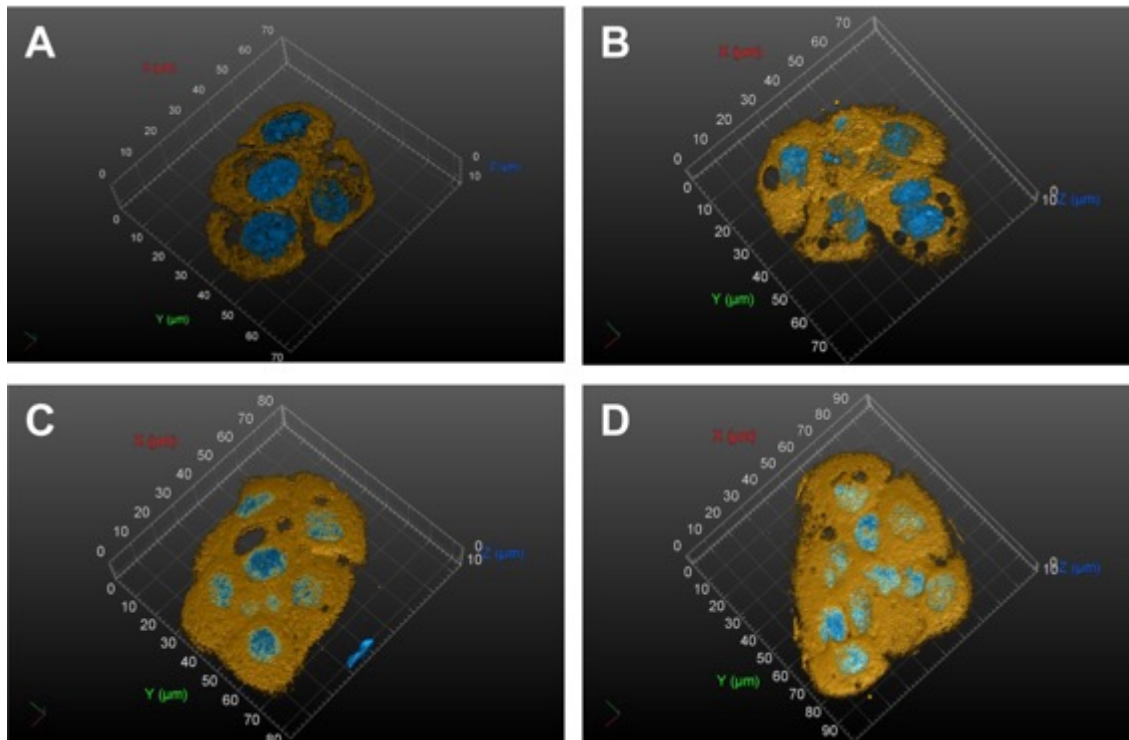

Supplementary information, Figure S5. 3D reconstruction of HaCaT cells treated with LDC-3 and immunostained with the antibody specific to phospho-Tyr176-PTPIP51.

The cells do not show any shift in the protein localization, rather than an increase in total amount of tyrosine 176 phosphorylated PTPIP51. The reconstruction was performed for the control group and each concentration of LDC-3: control (A), 5 $\mu$ M (B), 50 $\mu$ M (C), 100 $\mu$ M (D).

The grid indicates the length in  $\mu$ m.

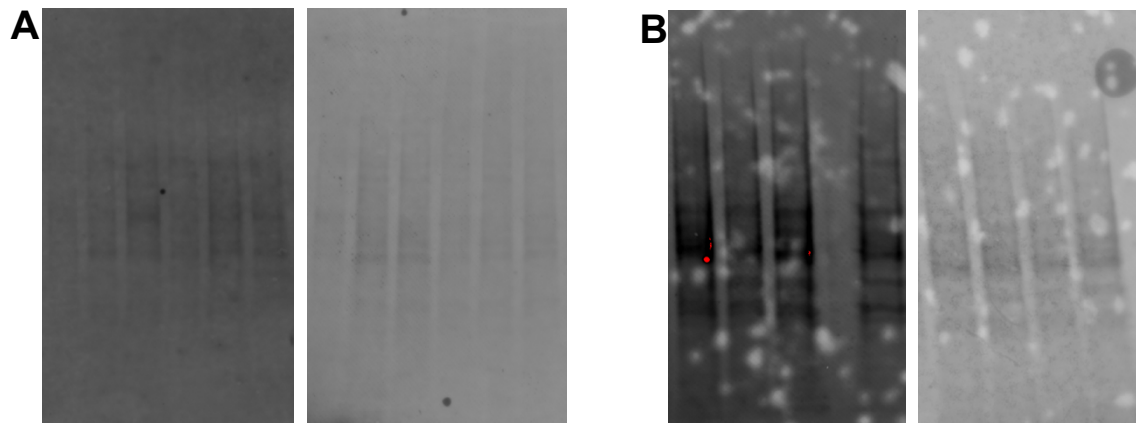

Supplementary information, Figure S6. Stain-free blot for quantification. Using this method no loading control is needed to quantify the data. (A) Stainfree-blot for the western blot analyses of phospho-MAPK and phospho-Akt (left blot) as well as of phospho-GSK3b and phospho-PKCa (right blot). (B) Stain-free blot for the siRNA knockdown experiments. Left blot: no LDC-3 treatment. Right blot: LDC-3 treatment.

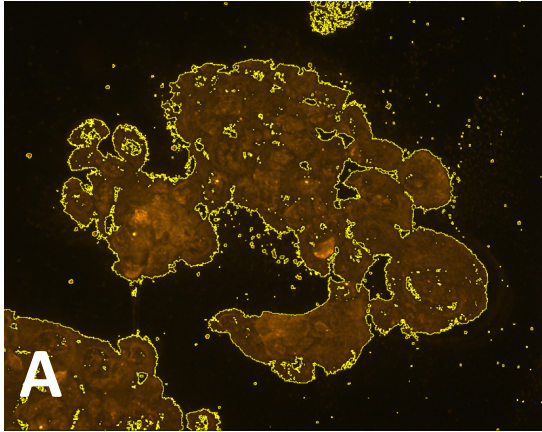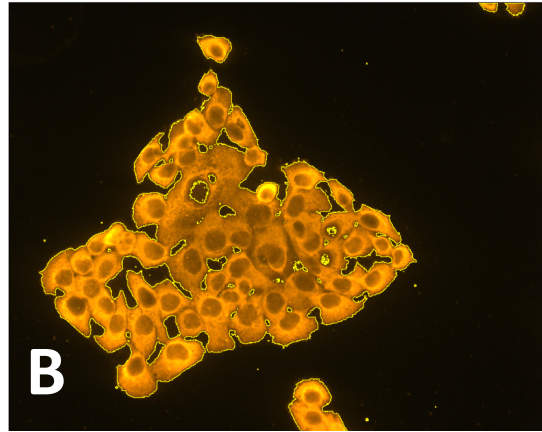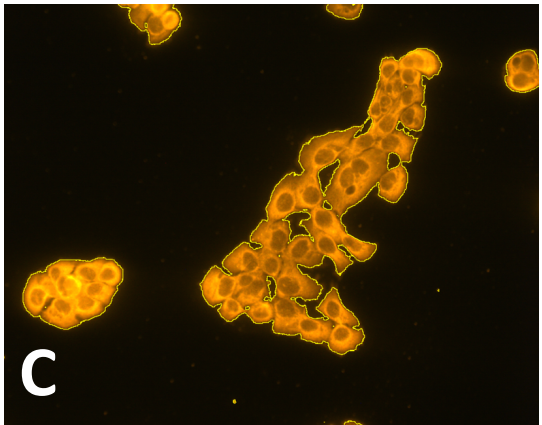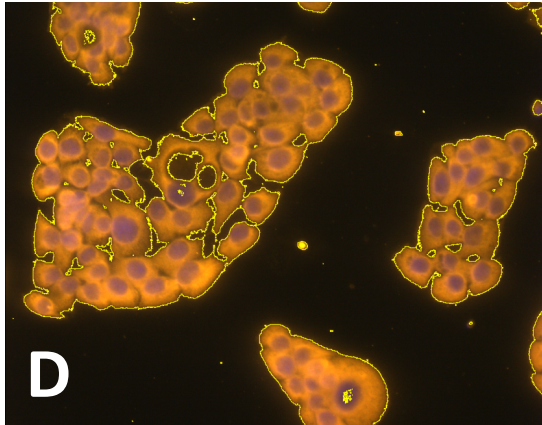

Supplementary information, Figure S7. Semiquantitative analyses of the tyrosine 176 phosphorylation status of PTPIP51. The cells were marked in ImageJ and the results of ten images (mean values of the encircled cells) were used for statistical analyses. (A) control, (B) 5µM LDC-3, (C) 50µM LDC-3, (D) 100µM LDC-3.

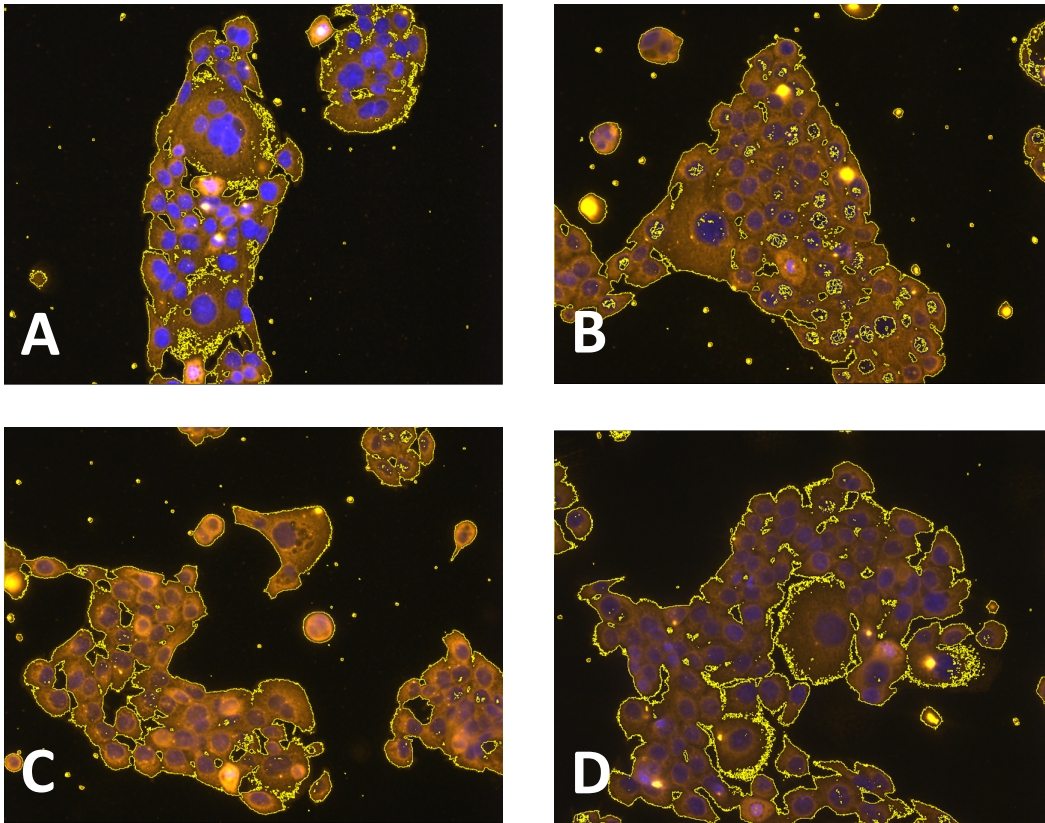

Supplementary information, Figure S8. Semiquantitative analyses of the serine 46 phosphorylation status of PTPIP51. The cells were marked in ImageJ and the results of ten images (mean values of the encircled cells) were used for statistical analyses. (A) control, (B) 5µM LDC-3, (C) 50µM LDC-3, (D) 100µM LDC-3.

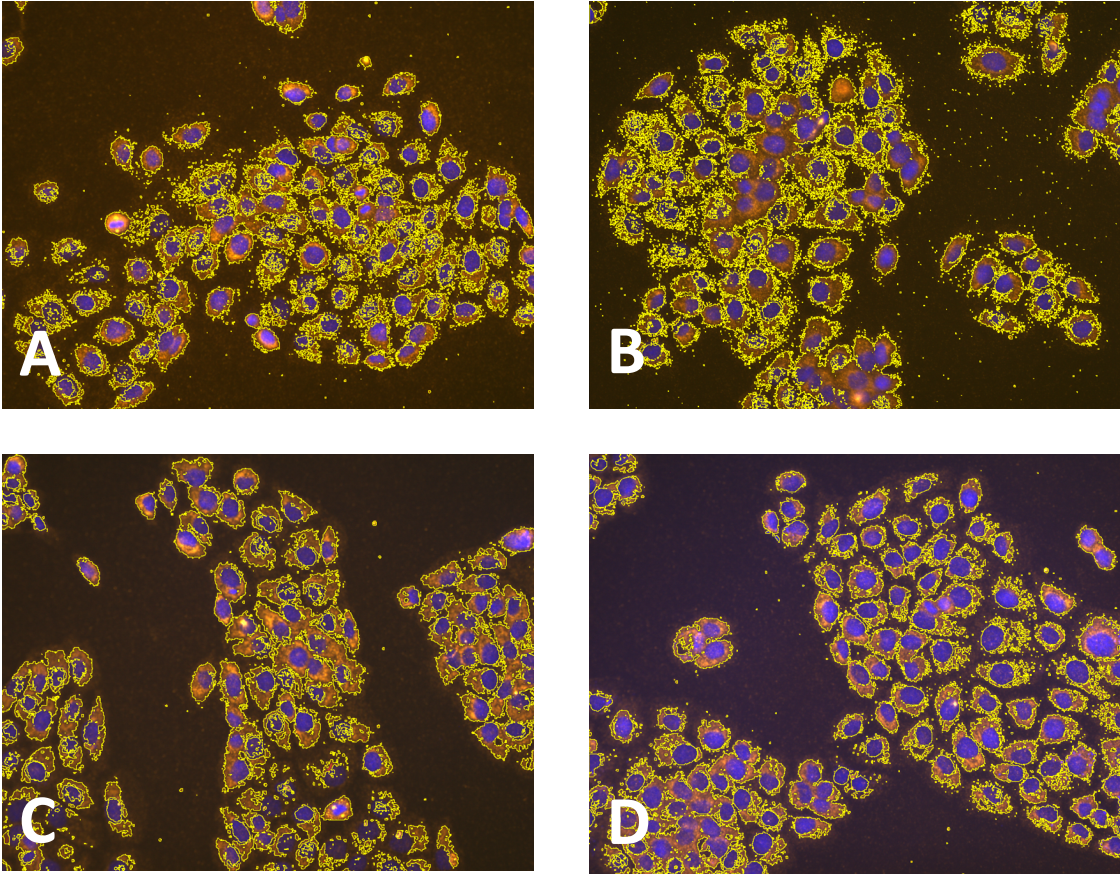

Supplementary information, Figure S9. Semiquantitative analyses of the serine 212 phosphorylation status of PTPIP51. The cells were marked in ImageJ and the results of ten images (mean values of the encircled cells) were used for statistical analyses. (A) control, (B) 5µM LDC-3, (C) 50µM LDC-3, (D) 100µM LDC-3.

## Semiquantitative analyses of the serine and tyrosine residues of PTPIP51

phosphorylated tyrosine 176 residue of PTPIP51  
control (untreated)

|    | Area   | Mean   | Min | Max |
|----|--------|--------|-----|-----|
| 1  | 20.253 | 32.614 | 18  | 208 |
| 2  | 11.817 | 40.703 | 18  | 193 |
| 3  | 13.786 | 32.327 | 17  | 191 |
| 4  | 10.397 | 29.756 | 17  | 135 |
| 5  | 10.397 | 29.756 | 17  | 135 |
| 6  | 10.376 | 35.077 | 19  | 189 |
| 7  | 21.254 | 40.540 | 20  | 242 |
| 8  | 11.746 | 48.147 | 23  | 227 |
| 9  | 10.617 | 39.913 | 19  | 181 |
| 10 | 10.137 | 50.353 | 28  | 197 |

5µM LDC-3

|    | Area   | Mean    | Min | Max |
|----|--------|---------|-----|-----|
| 1  | 21.316 | 106.514 | 47  | 198 |
| 2  | 21.959 | 108.042 | 48  | 233 |
| 3  | 14.200 | 103.601 | 51  | 204 |
| 4  | 9.609  | 117.317 | 50  | 199 |
| 5  | 20.017 | 99.299  | 50  | 181 |
| 6  | 15.017 | 111.852 | 48  | 200 |
| 7  | 11.216 | 112.814 | 50  | 184 |
| 8  | 7.928  | 119.871 | 47  | 172 |
| 9  | 10.572 | 119.908 | 53  | 177 |
| 10 | 16.041 | 121.942 | 45  | 190 |

50µM LDC-3

|    | Area   | Mean    | Min | Max |
|----|--------|---------|-----|-----|
| 1  | 18.518 | 100.783 | 46  | 193 |
| 2  | 14.028 | 96.900  | 49  | 184 |
| 3  | 20.584 | 89.783  | 48  | 160 |
| 4  | 15.790 | 93.578  | 47  | 188 |
| 5  | 15.975 | 92.446  | 48  | 191 |
| 6  | 8.609  | 102.564 | 52  | 171 |
| 7  | 18.472 | 97.261  | 50  | 215 |
| 8  | 19.544 | 100.263 | 51  | 190 |
| 9  | 14.052 | 133.898 | 48  | 240 |
| 10 | 9.872  | 131.884 | 49  | 219 |

100µM LDC-3

|    | Area   | Mean   | Min | Max |
|----|--------|--------|-----|-----|
| 1  | 18.936 | 90.302 | 49  | 171 |
| 2  | 13.985 | 72.923 | 31  | 160 |
| 3  | 8.988  | 78.876 | 43  | 172 |
| 4  | 7.788  | 80.493 | 43  | 196 |
| 5  | 11.937 | 78.526 | 38  | 196 |
| 6  | 4.702  | 92.515 | 47  | 202 |
| 7  | 11.897 | 84.214 | 44  | 171 |
| 8  | 3.306  | 98.974 | 45  | 194 |
| 9  | 12.950 | 96.581 | 44  | 181 |
| 10 | 9.946  | 85.396 | 43  | 181 |

phosphorylated serine 46 residue of PTPIP51  
control (untreated)

5µM LDC-3



|   | Area   | Mean   | Min | Max |
|---|--------|--------|-----|-----|
| 1 | 13.238 | 57.451 | 27  | 255 |
| 2 | 6.354  | 69.872 | 28  | 255 |
| 3 | 9.684  | 56.552 | 20  | 255 |
| 4 | 5.060  | 66.079 | 24  | 255 |
| 5 | 20.713 | 42.016 | 18  | 255 |
| 6 | 15.361 | 63.183 | 26  | 214 |
| 7 | 15.922 | 59.555 | 22  | 255 |
| 8 | 6.342  | 62.505 | 25  | 255 |
| 9 | 3.505  | 63.457 | 23  | 255 |

|    | Area   | Mean   | Min | Max |
|----|--------|--------|-----|-----|
| 1  | 24.548 | 39.384 | 19  | 255 |
| 2  | 15.197 | 43.823 | 20  | 255 |
| 3  | 23.834 | 44.049 | 24  | 255 |
| 4  | 17.840 | 46.307 | 19  | 255 |
| 5  | 13.930 | 59.123 | 25  | 255 |
| 6  | 8.932  | 49.415 | 26  | 255 |
| 7  | 6.759  | 38.388 | 20  | 249 |
| 8  | 9.103  | 55.484 | 28  | 255 |
| 9  | 18.109 | 54.784 | 27  | 255 |
| 10 | 14.831 | 58.836 | 26  | 255 |

50µM LDC-3

|    | Area   | Mean   | Min | Max |
|----|--------|--------|-----|-----|
| 1  | 3.957  | 85.812 | 40  | 255 |
| 2  | 7.716  | 69.270 | 27  | 255 |
| 3  | 15.006 | 59.534 | 27  | 255 |
| 4  | 6.185  | 64.390 | 27  | 255 |
| 5  | 15.225 | 55.365 | 29  | 255 |
| 6  | 14.194 | 57.797 | 24  | 255 |
| 7  | 6.181  | 59.167 | 24  | 255 |
| 8  | 7.856  | 45.199 | 20  | 231 |
| 9  | 16.518 | 65.125 | 29  | 255 |
| 10 | 5.090  | 80.327 | 30  | 255 |

100µM LDC-3

|    | Area   | Mean   | Min | Max |
|----|--------|--------|-----|-----|
| 1  | 23.520 | 39.196 | 18  | 255 |
| 2  | 7.222  | 35.480 | 16  | 223 |
| 3  | 15.414 | 25.477 | 15  | 254 |
| 4  | 14.827 | 39.521 | 22  | 246 |
| 5  | 10.635 | 45.857 | 19  | 194 |
| 6  | 24.114 | 41.503 | 24  | 243 |
| 7  | 12.688 | 43.222 | 25  | 255 |
| 8  | 7.002  | 56.014 | 30  | 255 |
| 9  | 6.076  | 77.574 | 40  | 235 |
| 10 | 12.596 | 40.210 | 17  | 230 |

phosphorylated serine 212 residue of PTP51  
control (untreated)

|   | Area   | Mean   | Min | Max |
|---|--------|--------|-----|-----|
| 1 | 28.444 | 75.846 | 47  | 253 |
| 2 | 16.316 | 52.955 | 36  | 224 |
| 3 | 30.535 | 47.358 | 31  | 228 |
| 4 | 29.523 | 48.576 | 32  | 253 |

5µM LDC-3

|   | Area   | Mean   | Min | Max |
|---|--------|--------|-----|-----|
| 1 | 27.216 | 46.313 | 29  | 253 |
| 2 | 25.870 | 44.365 | 29  | 253 |
| 3 | 31.511 | 39.094 | 25  | 253 |
| 4 | 25.711 | 44.683 | 27  | 246 |

|    |        |        |    |     |
|----|--------|--------|----|-----|
| 5  | 18.545 | 52.662 | 34 | 198 |
| 6  | 24.271 | 49.509 | 34 | 223 |
| 7  | 20.051 | 55.668 | 36 | 191 |
| 8  | 18.882 | 55.347 | 37 | 253 |
| 9  | 32.889 | 51.089 | 31 | 253 |
| 10 | 20.443 | 59.528 | 35 | 227 |

|    |        |        |    |     |
|----|--------|--------|----|-----|
| 5  | 17.937 | 40.963 | 28 | 214 |
| 6  | 24.833 | 40.838 | 29 | 233 |
| 7  | 28.079 | 39.163 | 26 | 253 |
| 8  | 12.062 | 48.815 | 31 | 247 |
| 9  | 18.222 | 47.780 | 33 | 124 |
| 10 | 26.745 | 40.898 | 27 | 206 |

50μM LDC-3

|    | Area   | Mean   | Min | Max |
|----|--------|--------|-----|-----|
| 1  | 25.623 | 50.726 | 32  | 253 |
| 2  | 29.479 | 44.642 | 29  | 253 |
| 3  | 30.718 | 39.432 | 26  | 253 |
| 4  | 21.104 | 45.354 | 29  | 193 |
| 5  | 31.686 | 43.433 | 28  | 253 |
| 6  | 14.508 | 39.423 | 27  | 253 |
| 7  | 15.001 | 38.341 | 26  | 233 |
| 8  | 31.859 | 38.626 | 26  | 241 |
| 9  | 16.590 | 40.600 | 27  | 197 |
| 10 | 21.100 | 37.513 | 27  | 212 |

100μM LDC-3

|    | Area   | Mean   | Min | Max |
|----|--------|--------|-----|-----|
| 1  | 30.264 | 49.451 | 32  | 253 |
| 2  | 17.462 | 56.793 | 35  | 184 |
| 3  | 17.891 | 53.113 | 32  | 239 |
| 4  | 18.292 | 60.607 | 37  | 244 |
| 5  | 29.754 | 54.007 | 35  | 236 |
| 6  | 28.200 | 60.935 | 42  | 253 |
| 7  | 26.180 | 57.396 | 36  | 243 |
| 8  | 20.222 | 51.877 | 35  | 253 |
| 9  | 27.550 | 48.015 | 32  | 253 |
| 10 | 16.252 | 48.988 | 34  | 253 |

## Western Blot analysis

### phospho-MAPK

|        | Band No. | Relative Fron Volume (Int) |           | Band % | Lane %    | Norm. Factor Norm. Vol. (Int) |           |             |
|--------|----------|----------------------------|-----------|--------|-----------|-------------------------------|-----------|-------------|
| Lane 1 | 1        | 0,723776                   | 45360     | 100    | 0,976162  | 1                             | 45360     | control     |
| Lane 2 | 1        | 0,724476                   | 113352848 | 100    | 89,165007 | 0,880588                      | 99817102  | 0,5µM LDC-3 |
| Lane 3 | 1        | 0,725175                   | 221391744 | 100    | 92,457641 | 1,620132                      | 358683797 | 5µM LDC-3   |
| Lane 4 | 1        | 0,723776                   | 101714480 | 100    | 85,252976 | 2,445313                      | 248723788 | 25µM LDC-3  |
| Lane 5 | 1        | 0,718881                   | 119398720 | 100    | 87,195497 | 2,399076                      | 286446556 | 50µ LDC-3   |
| Lane 6 | 1        | 0,711189                   | 135538032 | 100    | 89,265911 | 2,934817                      | 397779261 | 100µM LDC-3 |

### phospho-Akt (S473)

|        | Band No. | Relative Fron Volume (Int) |          | Band % | Lane %    | Norm. Factor Norm. Vol. (Int) |          |             |
|--------|----------|----------------------------|----------|--------|-----------|-------------------------------|----------|-------------|
| Lane 1 | 1        | 0,429371                   | 47269521 | 100    | 20,802828 | 1                             | 47269521 | control     |
| Lane 2 | 1        | 0,421678                   | 62230880 | 100    | 22,564182 | 0,880588                      | 54799736 | 0,5µM LDC-3 |
| Lane 3 | 1        | 0,420979                   | 28790002 | 100    | 4,354193  | 1,620132                      | 4664359  | 5µM LDC-3   |
| Lane 4 | 1        | 0,424476                   | 18657208 | 100    | 1,358712  | 2,445313                      | 4562272  | 25µM LDC-3  |
| Lane 5 | 1        | 0,421678                   | 1145046  | 100    | 1,422396  | 2,399076                      | 2747051  | 50µ LDC-3   |
| Lane 6 | 1        | 0,418182                   | 771584   | 100    | 0,779425  | 2,934817                      | 2264457  | 100µM LDC-3 |

### phospho-GSK3 beta

|        | Band No. | Relative Fron Volume (Int) |          | Band % | Lane %    | Norm. Factor Norm. Vol. (Int) |          |             |
|--------|----------|----------------------------|----------|--------|-----------|-------------------------------|----------|-------------|
| Lane 1 | 1        | 0,554882                   | 602822   | 100    | 98,119393 | 1                             | 602822   | control     |
| Lane 2 | 1        | 0,557307                   | 6493348  | 100    | 99,635666 | 0,933933                      | 6064352  | 0,5µM LDC-3 |
| Lane 3 | 1        | 0,556095                   | 6590974  | 100    | 99,605927 | 0,902391                      | 5947633  | 5µM LDC-3   |
| Lane 4 | 1        | 0,556095                   | 4306780  | 100    | 98,365815 | 0,935498                      | 4028982  | 25µM LDC-3  |
| Lane 5 | 1        | 0,554275                   | 31370912 | 100    | 99,865025 | 0,551956                      | 17315378 | 50µ LDC-3   |
| Lane 6 | 1        | 0,553062                   | 24451868 | 100    | 99,954936 | 0,719338                      | 17589162 | 100µM LDC-3 |

**phospho-PKC alpha**

|        | Band No. | Relative Fron Volume (Int) |          | Band % | Lane %    | Norm. Factor | Norm. Vol. (Int) |             |
|--------|----------|----------------------------|----------|--------|-----------|--------------|------------------|-------------|
| Lane 1 | 1        | 0,478421                   | 1057954  | 100    | 1,328877  | 1            | 1057954          | control     |
| Lane 2 | 1        | 0,476584                   | 1470737  | 100    | 0,811643  | 0,933933     | 1373570          | 0,5μM LDC-3 |
| Lane 3 | 1        | 0,471993                   | 11184163 | 100    | 4,863087  | 0,902391     | 10092484         | 5μM LDC-3   |
| Lane 4 | 1        | 0,471074                   | 1221127  | 100    | 0,717778  | 0,935498     | 1142361          | 25μM LDC-3  |
| Lane 5 | 1        | 0,471074                   | 14976818 | 100    | 4,673779  | 0,551956     | 8266551          | 50μ LDC-3   |
| Lane 6 | 1        | 0,46281                    | 24379376 | 100    | 10,419498 | 0,719338     | 17537016         | 100μM LDC-3 |

**siRNA-knockdown experiments****no LDC-3 treatment****PTPIP51**

|        | Band No. | Relative Fron Volume (Int) |           | Band % | Lane %    | Norm. Factor | Norm. Vol. (Int) |         |
|--------|----------|----------------------------|-----------|--------|-----------|--------------|------------------|---------|
| Lane 1 | 1        | 0,583567                   | 132448000 | 100    | 73,151765 | 1            | 132448000        | control |
| Lane 2 | 1        | 0,586368                   | 69771500  | 100    | 50,487424 | 1,162271     | 81093387         | siRNA A |
| Lane 3 | 1        | 0,587302                   | 209030000 | 100    | 77,991554 | 0,984957     | 205885659        | siRNA B |
| Lane 4 | 1        | 0,579832                   | 114891400 | 100    | 60,225561 | 0,744547     | 85542023         | siRNA C |

**phospho-MAPK**

|        | Band No. | Relative Fron Volume (Int) |           | Band % | Lane %    | Norm. Factor | Norm. Vol. (Int) |         |
|--------|----------|----------------------------|-----------|--------|-----------|--------------|------------------|---------|
| Lane 1 | 1        | 0,473389                   | 115415980 | 100    | 27,06594  | 1            | 115415980        | control |
| Lane 2 | 1        | 0,471522                   | 79615200  | 100    | 24,249739 | 1,162271     | 92534434         | siRNA A |
| Lane 3 | 1        | 0,467787                   | 55238193  | 100    | 9,850461  | 0,984957     | 54407270         | siRNA B |
| Lane 4 | 1        | 0,455649                   | 101645160 | 100    | 19,807519 | 0,744547     | 75679577         | siRNA C |

**LDC-3 treatment****PTPIP51**

|        | Band No. | Relative Fron Volume (Int) |           | Band % | Lane %    | Norm. Factor | Norm. Vol. (Int) |         |
|--------|----------|----------------------------|-----------|--------|-----------|--------------|------------------|---------|
| Lane 1 | 1        | 0,544563                   | 221723635 | 100    | 74,333622 | 1            | 221723635        | control |

|        |   |          |           |     |           |          |           |         |
|--------|---|----------|-----------|-----|-----------|----------|-----------|---------|
| Lane 2 | 1 | 0,544563 | 66884769  | 100 | 45,830706 | 1,307511 | 87452553  | siRNA A |
| Lane 3 | 1 | 0,545455 | 268376444 | 100 | 78,214121 | 1,083438 | 290769256 | siRNA B |
| Lane 4 | 1 | 0,533868 | 90577389  | 100 | 59,933153 | 1,506996 | 136499730 | siRNA C |

### phospho-MAPK

|        | Band No. | Relative Fron Volume (Int) | Band %    | Lane % | Norm. Factor | Norm. Vol. (Int) |           |         |
|--------|----------|----------------------------|-----------|--------|--------------|------------------|-----------|---------|
| Lane 1 | 1        | 0,414373                   | 325092040 | 100    | 37,457005    | 1                | 325092040 | control |
| Lane 2 | 1        | 0,417431                   | 166906040 | 100    | 34,044608    | 1,307511         | 218231439 | siRNA A |
| Lane 3 | 1        | 0,420489                   | 202981100 | 100    | 21,887193    | 1,083438         | 219917450 | siRNA B |
| Lane 4 | 1        | 0,415138                   | 110646760 | 100    | 29,059485    | 1,506996         | 166744184 | siRNA C |

## Immunoblotting for the phosphorylation status of PTPIP51

### Immunoblot pSer212-PTPIP51

| Lane | Band No. | Relative Front Volume (Int) | Band %   | Lane %    | Norm. Factor | Norm. Vol. (Int) |         |                          |
|------|----------|-----------------------------|----------|-----------|--------------|------------------|---------|--------------------------|
|      | 1        | 0,543014                    | 22889187 | 37,531729 | 4,000402     | 1                | 2623156 | control 52kDa            |
|      | 1        | 0,682725                    | 13621163 | 62,468271 | 6,658319     | 1                | 4366013 | control 38 kDa           |
|      |          |                             |          |           |              |                  | 6989169 | control Total protein    |
|      | 2        | 0,551273                    | 12610083 | 71,22605  | 3,042012     | 1,432632         | 1864613 | 10µM LDC-3 52kDa         |
|      | 2        | 0,68479                     | 5851861  | 28,77395  | 1,228914     | 1,432632         | 753267  | 10µM LDC-3 38kDa         |
|      |          |                             |          |           |              |                  | 2617880 | 10µM LDC-3 Total protein |
|      | 3        | 0,559532                    | 7778408  | 61,398213 | 2,175317     | 2,520859         | 2012515 | 25µM LDC-3 52kDa         |
|      | 3        | 0,707502                    | 9184029  | 38,601787 | 1,367648     | 2,520859         | 1265292 | 25µM LDC-3 38kDa         |
|      |          |                             |          |           |              |                  | 3277807 | 25µM LDC-3 Total protein |
|      | 4        | 0,573297                    | 16287023 | 70,27511  | 7,483294     | 1,581675         | 4288042 | 50µM LDC-3 52kDa         |
|      | 4        | 0,712319                    | 15215341 | 29,72489  | 3,165276     | 1,581675         | 1813751 | 50µM LDC-3 38kDa         |
|      |          |                             |          |           |              |                  | 6101793 | 50µM LDC-3 Total protein |
|      | 5        | 0,580179                    | 24847134 | 31,220198 | 6,10717      | 0,901083         | 3519773 | 100µM LDC-3 52kDa        |
|      | 5        | 0,721266                    | 30967936 | 68,779802 | 13,454429    | 0,901083         | 7754253 | 100µM LDC-3 38kDa        |

11274026

100μM LDC-3 Total protein

**Immunoblot pTyr176-PTPIP51**

| Lane | Band No. | Relative Front | Volume (Int) | Band %    | Lane %    | Norm. Factor | Norm. Vol. (Int) |                           |
|------|----------|----------------|--------------|-----------|-----------|--------------|------------------|---------------------------|
| 1    | 1        | 0,496134       | 50333500     | 15,947454 | 8,446312  | 1            | 18953760         | control 52kDa             |
| 1    | 2        | 0,556701       | 35998620     | 5,523725  | 2,925552  | 1            | 6565020          | control 45 kDa            |
| 1    | 3        | 0,719072       | 138245520    | 78,528821 | 41,591526 | 1            | 93332540         | control 38 kDa            |
|      |          |                |              |           |           |              | 118851320        | control Total protein     |
| 2    | 1        | 0,483247       | 61056800     | 69,678565 | 23,462668 | 0,885364     | 22468106         | 10μM LDC-3 52kDa          |
| 2    | 2        | 0,552835       | 5186020      | 2,687722  | 0,905029  | 0,885364     | 866665           | 10μM LDC-3 45kDa          |
| 2    | 3        | 0,706186       | 30177280     | 27,633713 | 9,305023  | 0,885364     | 8910591          | 10μM LDC-3 38kDa          |
|      |          |                |              |           |           |              | 32245362         | 10μM LDC-3 Total protein  |
| 3    | 1        | 0,487113       | 61432280     | 78,572481 | 24,460857 | 2,690292     | 64302758         | 25μM LDC-3 52kDa          |
| 3    | 2        | 0,559278       | 5828060      | 3,864032  | 1,202934  | 2,690292     | 3162276          | 25μM LDC-3 45kDa          |
| 3    | 3        | 0,713918       | 27669600     | 17,563488 | 5,467792  | 2,690292     | 14373743         | 25μM LDC-3 38kDa          |
|      |          |                |              |           |           |              | 81838777         | 25μM LDC-3 Total protein  |
| 4    | 1        | 0,488402       | 62225380     | 22,222728 | 13,601749 | 1,967189     | 52417834         | 50μM LDC-3 52kDa          |
| 4    | 2        | 0,541237       | 74020380     | 15,946085 | 9,760037  | 1,967189     | 37612810         | 50μM LDC-3 45kDa          |
| 4    | 3        | 0,706186       | 131115180    | 61,831187 | 37,844691 | 1,967189     | 145844241        | 50μM LDC-3 38kDa          |
|      |          |                |              |           |           |              | 235874885        | 50μM LDC-3 Total protein  |
| 5    | 1        | 0,484536       | 109812500    | 18,475327 | 10,332215 | 1,384209     | 48541699         | 100μM LDC-3 52kDa         |
| 5    | 2        | 0,552835       | 115350900    | 15,457976 | 8,64478   | 1,384209     | 40613973         | 100μM LDC-3 45kDa         |
| 5    | 3        | 0,708763       | 212909200    | 66,066698 | 36,947404 | 1,384209     | 173582304        | 100μM LDC-3 38kDa         |
|      |          |                |              |           |           |              | 262737976        | 100μM LDC-3 Total protein |
